# Supplementary material for: Indirect epigenetic testing identifies a diagnostic signature of cardiomyocyte DNA methylation in heart failure
Source: Springer Nature journal article supplement (doi:10.1007/s00395-022-00954-3), 2023-03-20

**A**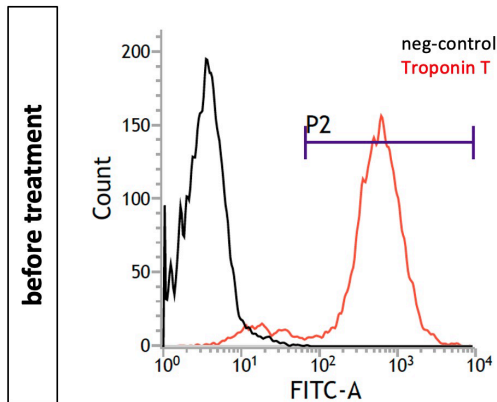**B**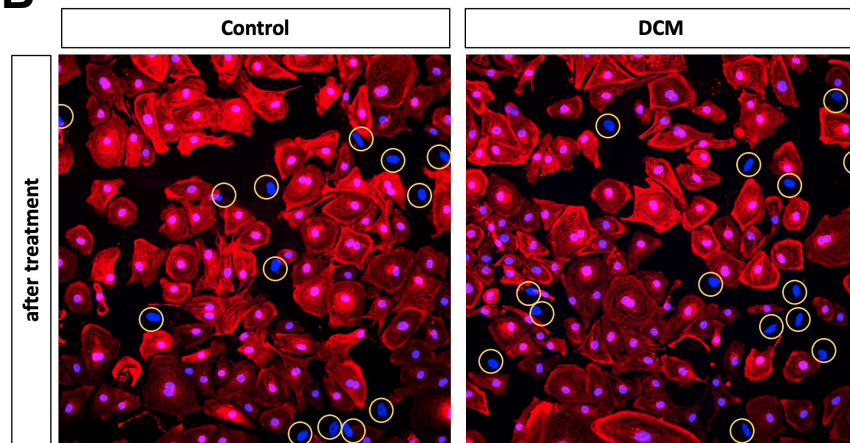**C**

quantification

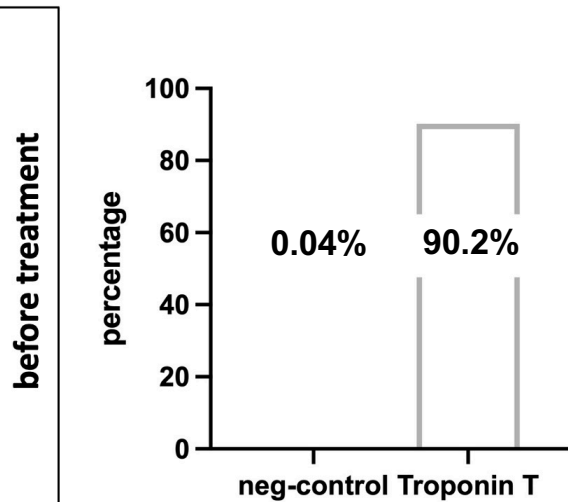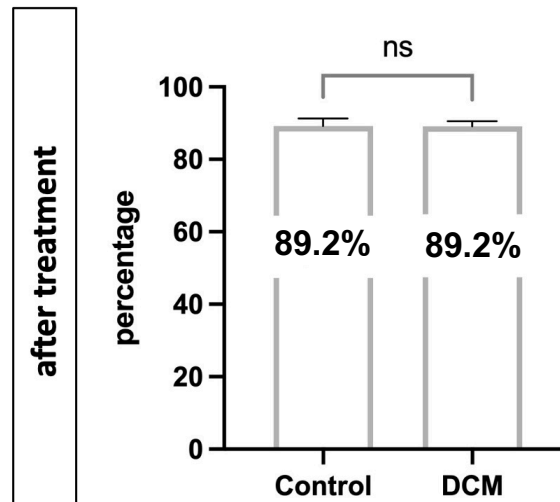

Supplement: MOESM1 [file 24645914]
