# Supplementary material for: Indirect epigenetic testing identifies a diagnostic signature of cardiomyocyte DNA methylation in heart failure
Source: Springer Nature journal article supplement (doi:10.1007/s00395-022-00954-3), 2023-03-20

**A**

### Putative SNPs (477 CpGs)

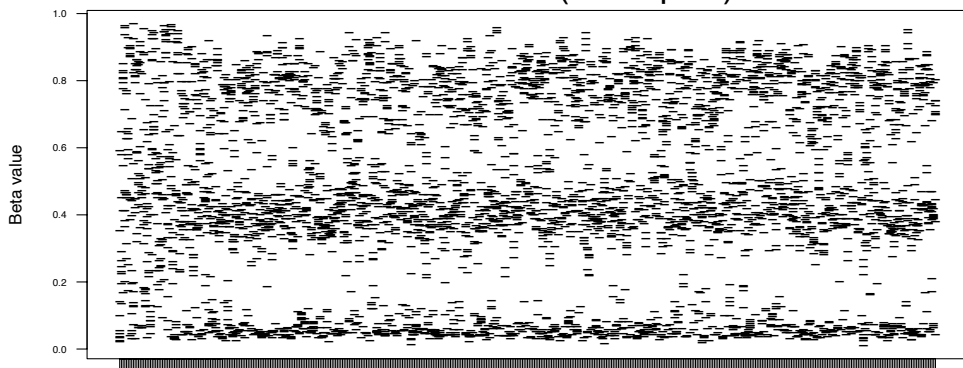**B**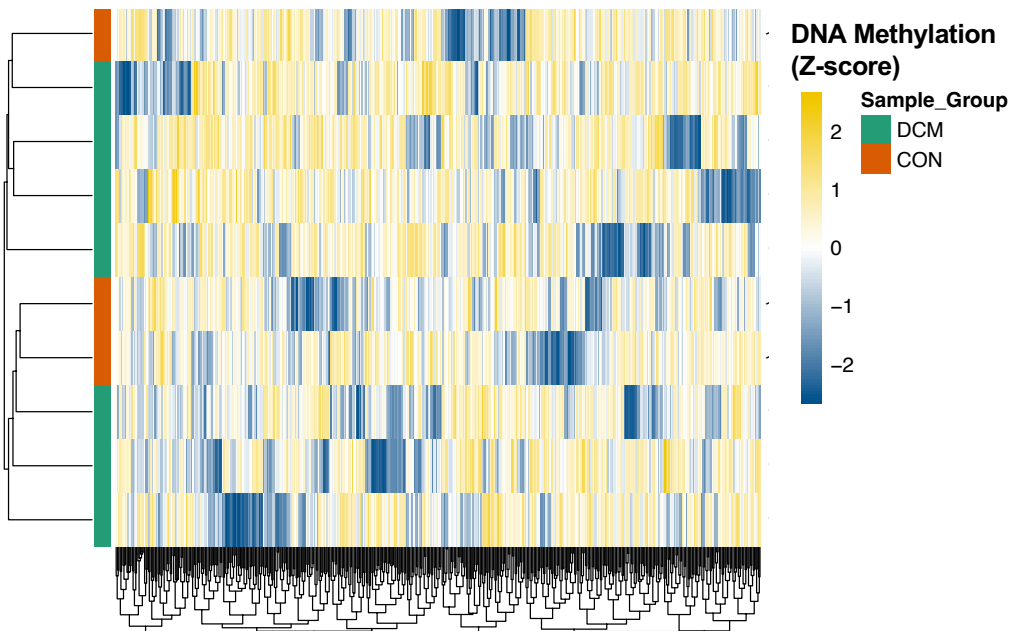

Supplement: MOESM4 [file 24645914]
